# Supplementary material
Source: Springer Nature journal article supplement (https://www.springermedizin.de/resource/supplementary/12889_2012_6032_MOESM2_ESM.pdf/9494246)

WHO target 2010 = 75%

WHO target 2006 = 50%

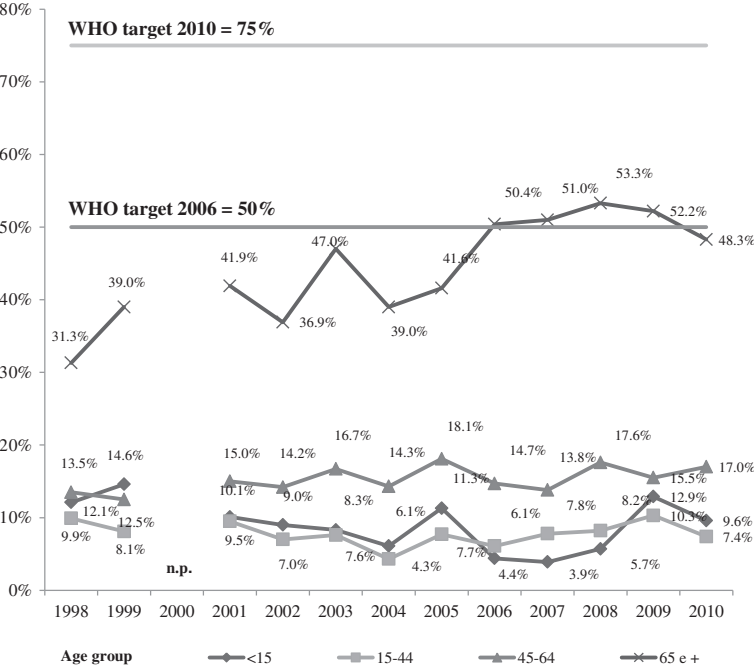

Supplement: MOESM2 [file 9494246]
